# Supplementary material for: Effect of Remote Ischemic Preconditioning on Perioperative Cardiac Events in Patients Undergoing Elective Percutaneous Coronary Intervention: A Meta-Analysis of 16 Randomized Trials
Source: Hindawi journal article supplement (doi:10.1155/2017/6907167), 2017-01-01
Supplement: f1 [file 6907167.f1.pdf]

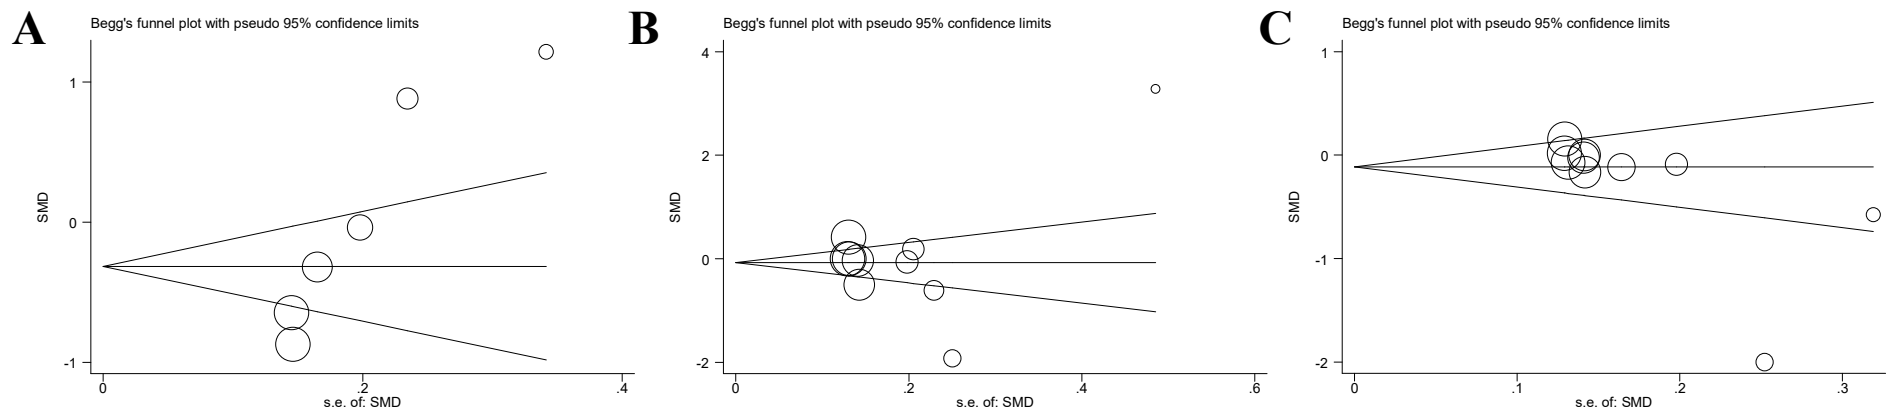

**Supplementary Figure 1** The Begg's funnel plot for publication bias test. **(A)** the incidence of PMI; **(B)** the incidence of AKI; **(C)** the levels of cTnI at 12h postoperatively; **(D)** the levels of cTnI at 24h postoperatively; **(E)** the levels of CRP 12-24 hours after PCI.

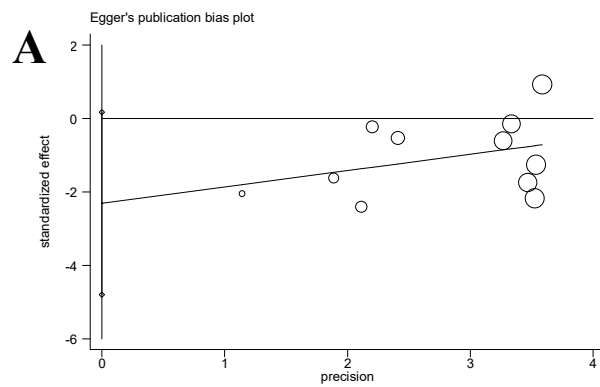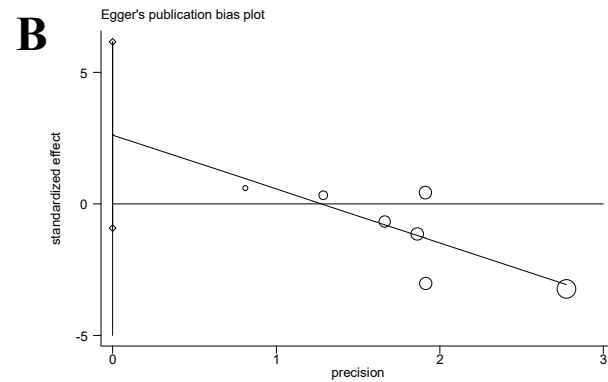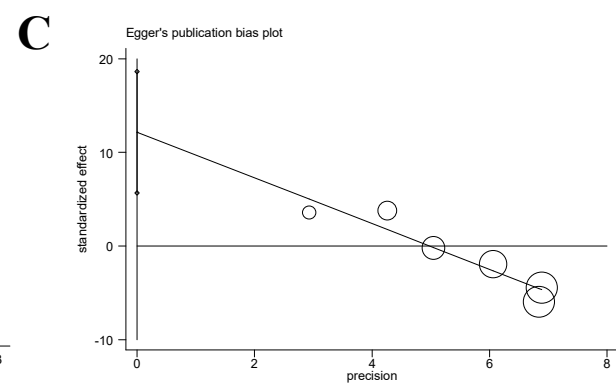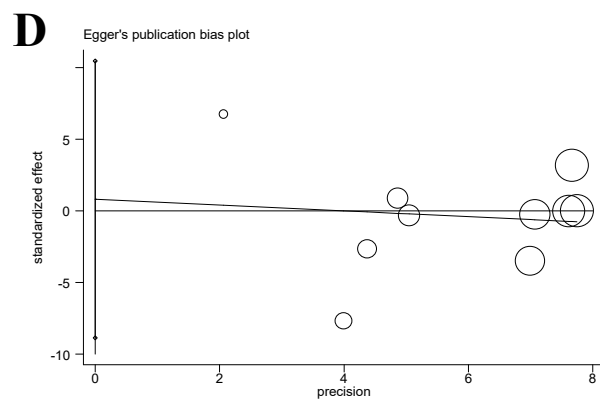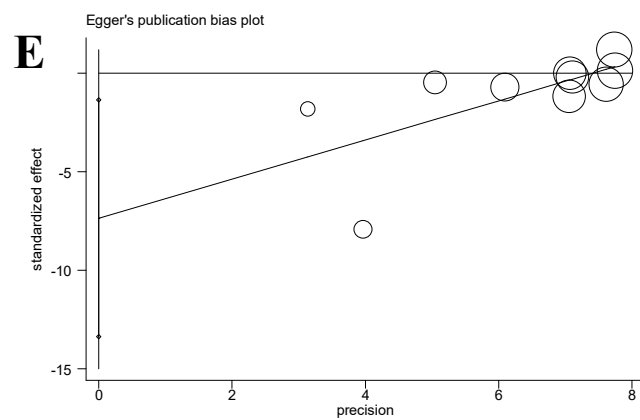

**Supplementary Figure 2** The egger's funnel plot for publication bias test. **(A)** the levels of cTnI at 12h postoperatively **(B)** the levels of cTnI at 24h postoperatively **(C)** the levels of CRP 12-24 hours after PCI. cTnI: Troponin I; CPR:C-reactive protein.
